# Supplementary material
Source: PubMed Central journal article supplement (PMC3490405)
Supplement: NIHMS411662-supplement-sizing_them_up_measure.pdf [file NIHMS411662-supplement-sizing_them_up_measure.pdf]

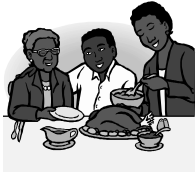

**SIZING THEM UP**  
PARENT VERSION (children 5-18 years)

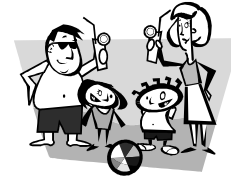

*Understanding the impact of your child's health and treatment (e.g. exercise, diet) on their day-to-day activities can help healthcare professionals provide better treatment recommendations for you and your child. For this reason, we have developed a weight-specific quality of life measure for parents of children with obesity.*

**INSTRUCTIONS:** The following questions are regarding your child's quality of life and your perceptions of how their weight/shape/size impacts their day to day activities. *Please answer all the questions.* There are no right or wrong answers. If you are unsure how to answer a particular question, please choose the response that seems to best fit your child's situation.

SUBJECT ID: \_\_\_\_\_

DATE: \_\_\_\_\_

Has your child been on vacation, out of school, or had any major changes (e.g. moving, starting a new school) during the past month?

NO       YES If yes, please explain: \_\_\_\_\_

**Please indicate how your child has been feeling within the past MONTH regarding their weight/shape/size by checking the box that best fits your child.**

*During the past month, indicate how often your child:*

Never    Sometimes    Often    Always

- |                                                                                                               |                          |                          |                          |                          |
|---------------------------------------------------------------------------------------------------------------|--------------------------|--------------------------|--------------------------|--------------------------|
| 1. Had difficulty participating in physical activities (e.g. sports) because of their weight/shape/size.....  | <input type="checkbox"/> | <input type="checkbox"/> | <input type="checkbox"/> | <input type="checkbox"/> |
| 2. Was teased by peers because of their weight/shape/size.....                                                | <input type="checkbox"/> | <input type="checkbox"/> | <input type="checkbox"/> | <input type="checkbox"/> |
| 3. Chose not to go to school because of their weight/shape/size.....                                          | <input type="checkbox"/> | <input type="checkbox"/> | <input type="checkbox"/> | <input type="checkbox"/> |
| 4. Felt sad because of their weight/shape/size.....                                                           | <input type="checkbox"/> | <input type="checkbox"/> | <input type="checkbox"/> | <input type="checkbox"/> |
| 5. Had to make changes to surroundings (e.g. furniture, school desks) because of their weight/shape/size..... | <input type="checkbox"/> | <input type="checkbox"/> | <input type="checkbox"/> | <input type="checkbox"/> |
| 6. Argued about when, what and how much to eat.....                                                           | <input type="checkbox"/> | <input type="checkbox"/> | <input type="checkbox"/> | <input type="checkbox"/> |

*During the past month, indicate how often your child:*

|                                                                                                                 | Never                    | Sometimes                | Often                    | Always                   |
|-----------------------------------------------------------------------------------------------------------------|--------------------------|--------------------------|--------------------------|--------------------------|
| 7. Chose not to participate in gym/recess/ physical education at school because of their weight/shape/size..... | <input type="checkbox"/> | <input type="checkbox"/> | <input type="checkbox"/> | <input type="checkbox"/> |
| 8. Felt frustrated because of their weight/shape/size...                                                        | <input type="checkbox"/> | <input type="checkbox"/> | <input type="checkbox"/> | <input type="checkbox"/> |
| 9. Avoided dressing or undressing in front of others because of their weight/shape/size.....                    | <input type="checkbox"/> | <input type="checkbox"/> | <input type="checkbox"/> | <input type="checkbox"/> |
| 10. Kept their body clean and fresh.....                                                                        | <input type="checkbox"/> | <input type="checkbox"/> | <input type="checkbox"/> | <input type="checkbox"/> |
| 11. Felt worried because of their weight/shape/size.....                                                        | <input type="checkbox"/> | <input type="checkbox"/> | <input type="checkbox"/> | <input type="checkbox"/> |
| 12. Felt left out because of their weight/shape/size (e.g. no one talks or sits with them).....                 | <input type="checkbox"/> | <input type="checkbox"/> | <input type="checkbox"/> | <input type="checkbox"/> |
| 13. Felt mad because of their weight/shape/size.....                                                            | <input type="checkbox"/> | <input type="checkbox"/> | <input type="checkbox"/> | <input type="checkbox"/> |
| 14. Was teased by others when physically active because of their weight/shape/size.....                         | <input type="checkbox"/> | <input type="checkbox"/> | <input type="checkbox"/> | <input type="checkbox"/> |
| 15. Seen as having a good sense of humor.....                                                                   | <input type="checkbox"/> | <input type="checkbox"/> | <input type="checkbox"/> | <input type="checkbox"/> |
| 16. Felt concerned about their weight/shape/size.....                                                           | <input type="checkbox"/> | <input type="checkbox"/> | <input type="checkbox"/> | <input type="checkbox"/> |
| 17. Perceived as healthy by others.....                                                                         | <input type="checkbox"/> | <input type="checkbox"/> | <input type="checkbox"/> | <input type="checkbox"/> |
| 18. Became upset at mealtimes (e.g. cried, fussed, argued).....                                                 | <input type="checkbox"/> | <input type="checkbox"/> | <input type="checkbox"/> | <input type="checkbox"/> |
| 19. Had difficulty keeping up with other children because their weight/shape/size.....                          | <input type="checkbox"/> | <input type="checkbox"/> | <input type="checkbox"/> | <input type="checkbox"/> |
| 20. Felt successful in daily activities.....                                                                    | <input type="checkbox"/> | <input type="checkbox"/> | <input type="checkbox"/> | <input type="checkbox"/> |
| 21. Became out of breath and had to slow down because of their weight/shape/size.....                           | <input type="checkbox"/> | <input type="checkbox"/> | <input type="checkbox"/> | <input type="checkbox"/> |
| 22. Had low self-esteem because of their weight/shape/size.....                                                 | <input type="checkbox"/> | <input type="checkbox"/> | <input type="checkbox"/> | <input type="checkbox"/> |

For parents of children **14 years and older:**

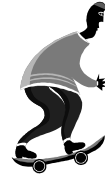

*During the past month, indicate how often your child:*

Never   Sometimes   Often   Always

- |                                                                                                     |                          |                          |                          |                          |
|-----------------------------------------------------------------------------------------------------|--------------------------|--------------------------|--------------------------|--------------------------|
| 23. Talked about difficulties dating due to their weight/shape/size.....                            | <input type="checkbox"/> | <input type="checkbox"/> | <input type="checkbox"/> | <input type="checkbox"/> |
| 24. Preferred to spend time alone because of their weight/shape/size.....                           | <input type="checkbox"/> | <input type="checkbox"/> | <input type="checkbox"/> | <input type="checkbox"/> |
| 25. Participated in hobbies/clubs (e.g. church group, school club, 4-H, scouts).....                | <input type="checkbox"/> | <input type="checkbox"/> | <input type="checkbox"/> | <input type="checkbox"/> |
| 26. Found it difficult to find a job/volunteer activity because of their weight/shape/size.....     | <input type="checkbox"/> | <input type="checkbox"/> | <input type="checkbox"/> | <input type="checkbox"/> |
| 27. Worried about the future because of their weight/shape/size.....                                | <input type="checkbox"/> | <input type="checkbox"/> | <input type="checkbox"/> | <input type="checkbox"/> |
| 28. Attended extracurricular school activities (e.g. dances, sporting events, clubs, concerts)..... | <input type="checkbox"/> | <input type="checkbox"/> | <input type="checkbox"/> | <input type="checkbox"/> |
